# Supplementary material
Source: PubMed Central journal article supplement (PMC7001886)
Supplement: NIHMS1549103-supplement-314541_Online_Supplement.pdf [file NIHMS1549103-supplement-314541_Online_Supplement.pdf]

## SUPPLEMENTAL MATERIALS

### Members of the VITAL Research Group

### Supplementary Table

**Table I.** Hazard ratios (HR) and 95% confidence intervals (CI) of major cardiovascular disease events comparing vitamin D and placebo groups, according to baseline serum 25(OH)D and n-3 fatty acid randomization status

### Supplementary Figure

**Figure I.** Hazard ratios (HR) and 95% confidence intervals (CI) of major cardiovascular events according to subgroup, comparing the n-3 fatty acid group with the placebo group. (From Cox regression models controlling for age, sex, and vitamin D randomization group.)

**VITAL Research Group:**

VITAL Steering Committee: JoAnn E. Manson (Chair), Julie E. Buring (Chair), Nancy R. Cook, I-Min Lee, William Christen, Shari S. Bassuk, Samia Mora, Heike Gibson, David Gordon, Trisha Copeland, Denise D'Agostino, Georgina Friedenber, Claire Ridge, Vadim Bubes, Edward L. Giovannucci, Walter C. Willett (all at Brigham and Women's Hospital, Harvard Medical School, Boston; Drs Manson, Buring, Cook, Lee, Giovannucci and Willett are also at the Harvard T.H. Chan School of Public Health).

Scientific consultants: John Baron (University of North Carolina, Chapel Hill), Michael Holick (Boston Medical Center), Bruce Hollis (University of South Carolina).

Other Members of the VITAL Research Group: (Brigham and Women's Hospital): Christine M. Albert, Diane Gold, Meryl LeBoff, Olivia Okereke, Aruna Pradhan, Howard Sesso, Wendy Chen, Paulette Chandler, J. Michael Gaziano; Olga Demler, Kathryn Rexrode, Karen Costenbader, John Forman, Erik Alexander, Sonia Friedman, Jeffrey Katz, Shumin Zhang, Jennifer Lin, Joseph Walter, Julie Duszlak, Kate Kalan, Jean MacFadyen, Natalya Gomelskaya, David Bates, Ara Sarkissian, Mary Breen, Yeulolani Andrade, Manickavasagar Vinayagamoorthy, Chunying Li, Eunjung Kim, Franco Giulianini, Gregory Kotler, Marty Van Denburgh, Rimma Dushkes, Yanyan Liu, Eduardo Pereira, Lisa Fields-Johnson, George Menjin, Lucy Liu, Lauren Girard, Scott Zeller, Naomi Riches, Katelyn Hasson, Ellen Bhang, Maria Revilla, Elena McCarthy, Alex Moran, Kristen Haise, Leah Arsenault, Philomena Quinn, Sancia Grimes, Ivan Fitchorov, Kurt Schwerin, Shamikhah Curry, Annie Murray, Angela Zhang, Diana Walrond-Williams, Alison Weinberg, Chris Pfeffer, Margarete Haubourg, Viviane Nguyen, Henry Ouellette, Rolando Rodriguez, Tony Montgomery, Keith Morse, Vincent Guzman, Megan Perry, Sandra Weekes, Doug Smith, Allison Clar, Sara Curran, Yaneve Fonge, David Hibbert, Louisa Paine, Kelly Royce, Courtney Splaine, Jennifer McMahon, David Eldridge, Laura Hand, Kay Inandan, Meghan Rieu Werden, Harriet Samuelson, Andrea Hrbek, Megan Mele, Eileen Bowes, Mary Anne Ryan

(Massachusetts General Hospital, Boston): Carlos Camargo, Jacqueline Danik, Ravi Thadhani

(Vanderbilt University, Nashville): Thomas Wang

(Rush University Medical Center, Chicago): Raj C. Shah

(University of California, San Francisco): Michelle A. Albert

(Emory University): Carlos Kase

(Centers for Disease Control and Prevention): Hubert Vesper and Julianne Botelho.

**Data and Safety Monitoring Board** (Voting Members): Lawrence S. Cohen, MD; Theodore Colton, ScD; Mark A. Espeland, PhD; Craig Henderson, MD; Alice H. Lichtenstein, ScD; Rebecca A. Silliman, MD, PhD; and Nanette Wenger, MD (Chair). Ex-officio members include Josephine Boyington, PhD, MPH; Rebecca Costello, PhD; Cindy Davis, PhD; Peter Greenwald, MD; Gabriela Riscuta, MD; and Harold Seifried, PhD.

**Table I.** Hazard ratios (HR) and 95% confidence intervals (CI) of major cardiovascular disease events comparing vitamin D and placebo groups, according to baseline serum 25(OH)D and n-3 fatty acid randomization status

|                                     | Total  | Vitamin D            | Placebo | HR (95% CI)      | P, interaction |
|-------------------------------------|--------|----------------------|---------|------------------|----------------|
|                                     |        | <i>no. of events</i> |         |                  |                |
| Baseline serum 25(OH)D <sup>a</sup> | 15,787 |                      |         |                  |                |
| <20 ng/mL                           | 2,001  | 34                   | 34      | 1.09 (0.68-1.76) | 0.75           |
| ≥20 ng/mL                           | 13,786 | 218                  | 216     | 1.00 (0.83-1.21) |                |
| Baseline serum 25(OH)D              | 15,787 |                      |         |                  |                |
| <31 ng/mL <sup>b</sup>              | 7,812  | 128                  | 139     | 0.94 (0.74-1.20) | 0.42           |
| ≥31 ng/mL                           | 7,975  | 124                  | 111     | 1.09 (0.84-1.41) |                |
| n-3 fatty acid randomization status | 25,871 |                      |         |                  |                |
| Placebo group                       | 12,938 | 210                  | 209     | 1.01 (0.83-1.22) | 0.56           |
| n-3 fatty acid group                | 12,933 | 186                  | 200     | 0.93 (0.76-1.14) |                |

<sup>a</sup>25(OH), 25-hydroxyvitamin D. To convert to nmol/L, multiply by 2.5.

<sup>b</sup>31 ng/mL is cohort median.

**Figure I.** Hazard ratios (HR) and 95% confidence intervals (CI) of major cardiovascular events according to subgroup, comparing the n-3 fatty acid group with the placebo group. (From Cox regression models controlling for age, sex, and vitamin D randomization group.) *From: Manson JE et al., N Engl J Med 2019; 380:23-32.*

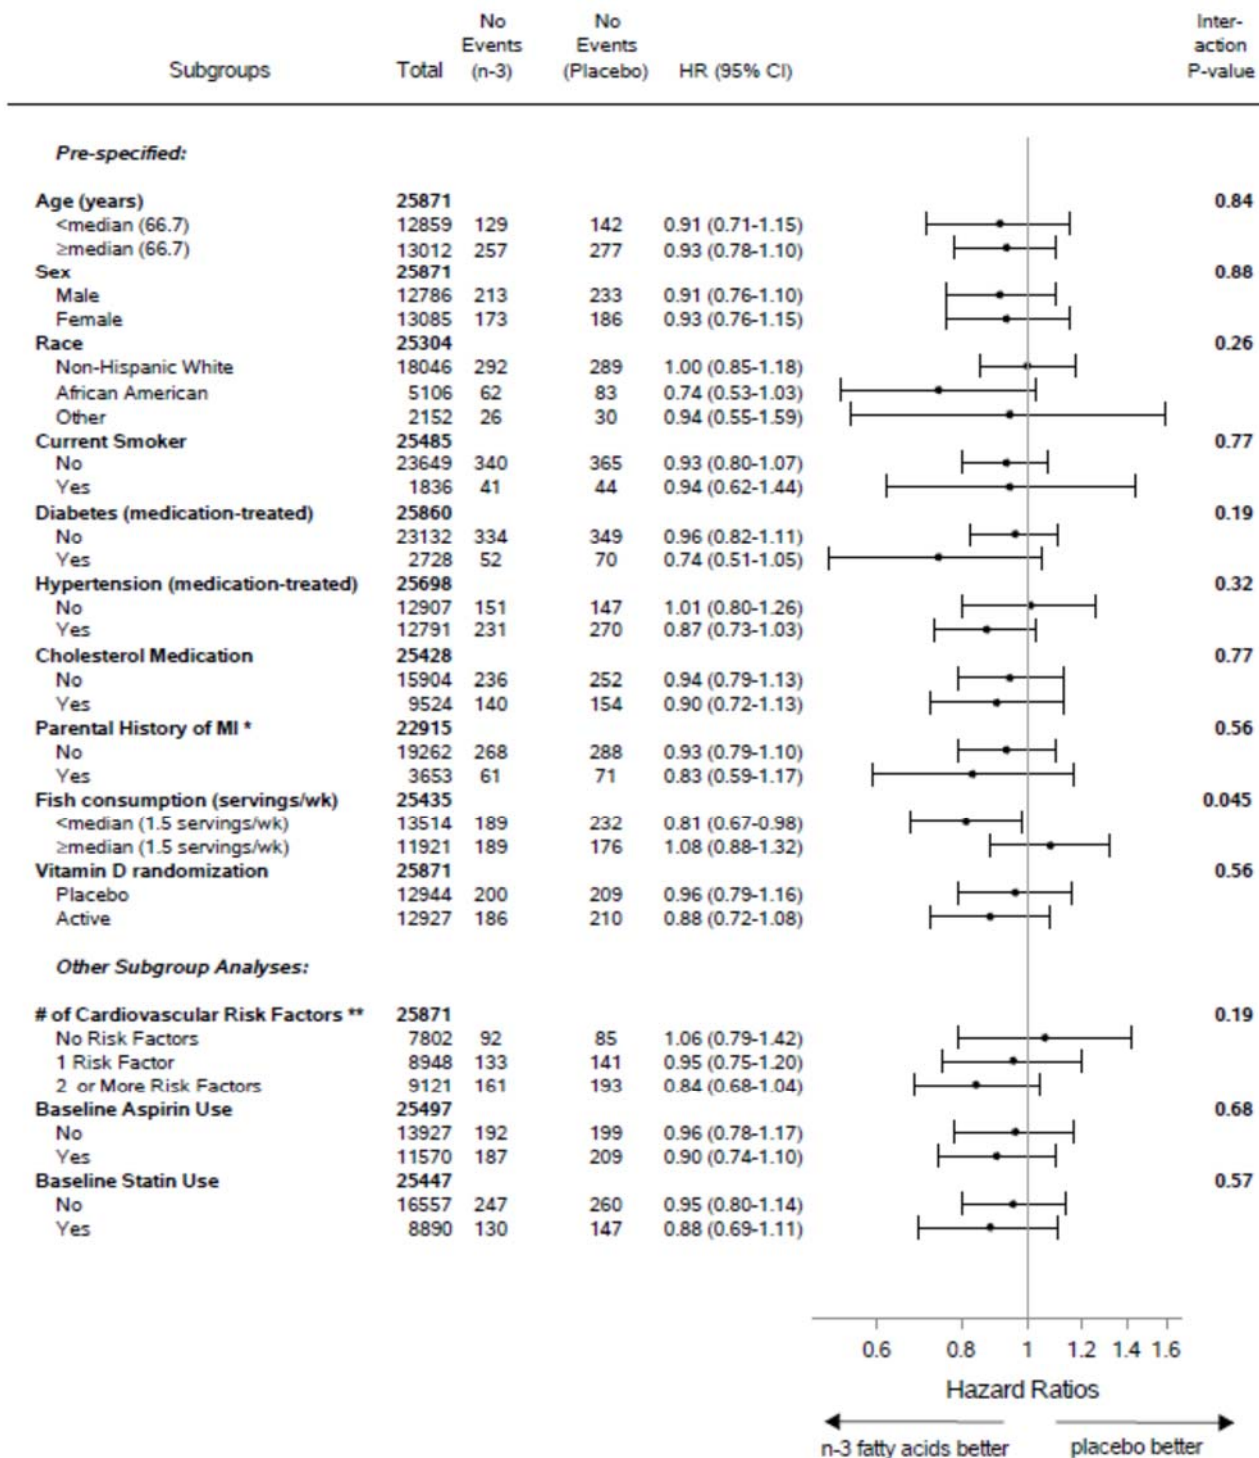

HR = hazard ratio; CI = confidence interval; MI = myocardial infarction

\* Premature MI in a parent (before age 60 in father and before 65 in mother)

\*\* Number of traditional cardiovascular disease risk factors (smoking, diabetes, hypertension, high cholesterol, parental history of premature MI)
